# Supplementary material
Source: publisher figshare collection journal article supplement (https://springernature.figshare.com/ndownloader/files/13533434)
Supplement: Supplementary file 1 [file 13533434]

| Year | Sampling month | age (months) | Number of sampled fish | Number and % of ripe females  (ripe/total females) | | Females | | Number % of ripe males  (ripe/total males) | | Males | |
| --- | --- | --- | --- | --- | --- | --- | --- | --- | --- | --- | --- |
|  |  |  |  | No. | % | Mean Wt (g) | FL (cm) | No. | % | Wt (gs) | FL (cm) |
| 1 | Jun. (2012) | 6 | 28 |  |  |  |  | 1/11 | 27 | 28 ± 2.2 | 13.9±2 |
| 1 | Sept.(2012) | 9 | 32 |  |  |  |  | 4/15 | 36 | 61 ± 2.0 | 16.1 ± 0.8 |
| 1 | Dec.(2012) | 12 | 30 |  |  |  |  | 7/12 | 63 | 120 ± 30 | 20.0 ± 2.1 |
| 2 | Oct.(2013) | 22 | 27 | 3/15 | 20 | 365 ± 70 | 28.9 ± 2.4 | 12/12 | 100 | 348 ± 50 | 28.8 ± 2.9 |
| 3 | Feb.(2014) | 27 | 25 | 10/14 | 72 | 680± 105 | 35.6 ± 9.0 | 11/11 | 100 | 492 ± 102 | 30.9 ± 3.3 |
| 3 | Jun.(2014) | 31 | 42 | 23/25 | 93 | 800± 130 | 36.6 ± 5.6 |  |  |  |  |
